# Supplementary material for: Heterogeneous endotoxin detection bioassay using drug–nanoparticle bioconjugates: an optimization study
Source: Royal Society of Chemistry journal article supplement (doi:10.1039/c7me00037e), 2017-01-01
Supplement: c7me00037e1.pdf [file c7me00037e1.pdf]

# Heterogeneous endotoxin detection bioassay using drug-nanoparticle bioconjugates: An optimization study

*Prasanta Kalita<sup>†</sup>, Ashwin Bhola<sup>†</sup>, Nitish Goel<sup>†</sup>, Venkataraman Sritharan<sup>‡</sup> and Shalini Gupta<sup>†,\*</sup>*

<sup>†</sup>Dept. of Chemical Engineering, Indian Institute of Technology Delhi, Hauz Khas 110016, India

<sup>‡</sup>Molecular Diagnostics & Biomarkers Lab, Global Medical Education and Research Foundation, Hyderabad, 500004, India

## Supplementary Information

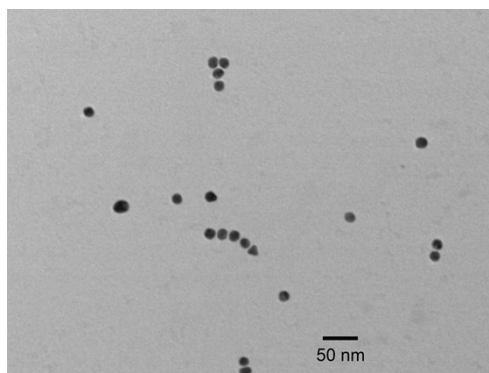

**Figure S1.** Transmission electron microscope (TEM) image of GNPs imaged using Jeol RM1400. The average size of the particles was estimated to be  $16 \pm 4$  nm from the particle size distribution histogram.

### **Image processing**

The acquired images were cropped to a uniform size of 1 inch x 1 inch and then processed using the Matlab (R2015a) software. A code was developed that had the following main components—

spot area identification, background area identification, average pixel value calculation for both regions and spot intensity normalization with respect to background. In this way, the final intensity values reported for each spot were dimensionless.

$$\text{normalized intensity, } I = \frac{\text{average background intensity} - \text{average spot area intensity}}{\text{average background intensity}}$$

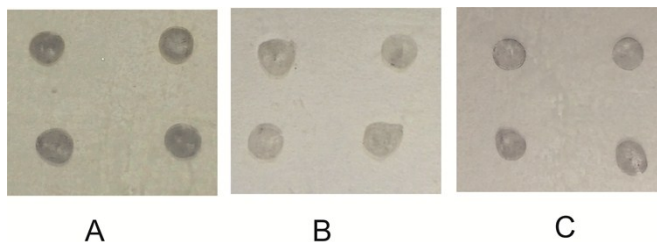

**Figure S2.** Bioassay spots obtained in quadruplicate on three different glass slides A, B and C for a single LPS concentration. The overall average intensity was calculated as

$$I_{avg} = \frac{I_{avg}(A) + I_{avg}(B) + I_{avg}(C)}{3}$$

**Table S1.** Results from the negative and positive controls performed in our bioassay.

| Controls                                           | Observation                                                                                                                                                                                       |
|----------------------------------------------------|---------------------------------------------------------------------------------------------------------------------------------------------------------------------------------------------------|
| Bare GNPs                                          | Dark shadows on the exposed glass slide after the silver enhancement step irrespective of their silanization status. This was presumably due to electrostatic interactions between GNP and glass. |
| Without LPS                                        | No spot; Clear background                                                                                                                                                                         |
| Real clinical samples from sepsis patients         | Similar results as those in spiked serum samples.                                                                                                                                                 |
| Icteric samples collected from non-sepsis patients | No interference of pigmentation was seen on the colorimetric response of the bioassays.                                                                                                           |
| Free PMB drug along with PMB-GNPs                  | Concentration-dependent competitive-binding*                                                                                                                                                      |
| Free bacitracin drug along with PMB-GNPs           | No change in bioassay performance*                                                                                                                                                                |

\*These two sets of experiments were performed on a modified bioassay format but using similar interaction chemistry. See Kalita S., Chaturvedula M., Sritharan V. and Gupta S., 'In vitro Flow-

Through Assay for Rapid Detection of Endotoxin in Human Sera' published in *Nanomedicine: Nanotechnology, Biology, and Medicine*, 13, 1483-1490 (2017) for complete details.
